# Supplementary material for: Een akte uit den jare 1317, waarin Wouter van Mijnden voor zich en zijne nakomelingen trouw belooft aan den graaf van Holland
Source: Royal Society of Chemistry journal article supplement (doi:10.1039/c9nr03490k), 1917-01-01
Supplement: c9nr03490k1.pdf [file c9nr03490k1.pdf]

## Electronic Supplementary Information

### **Mussel-Inspired Functionalization of Semiconducting Polymer Nanoparticles for Amplified Photoacoustic Imaging and Photothermal Therapy**

Biqing Bao,<sup>a</sup> Li Tong,<sup>a</sup> Yu Xu,<sup>a</sup> Jingjing Zhang,<sup>a</sup> Xue Zhai,<sup>a</sup> Peng Su,<sup>a</sup> Lixing Weng<sup>\*b</sup> and Lianhui Wang<sup>\*a</sup>

*<sup>a</sup>Key Laboratory for Organic Electronics and Information Displays & Jiangsu Key Laboratory for Biosensors, Institute of Advanced Materials (IAM), Jiangsu National Synergetic Innovation Center for Advanced Materials (SICAM), Nanjing University of Posts & Telecommunications, Nanjing 210023, China.*

*<sup>b</sup>School of Geography and Biological Information, Nanjing University of Posts and Telecommunications, Nanjing 210023, China.*

Corresponding e-mail: lxweng@njupt.edu.cn, [iamlhwang@njupt.edu.cn](mailto:iamlhwang@njupt.edu.cn).

**FIGURES**

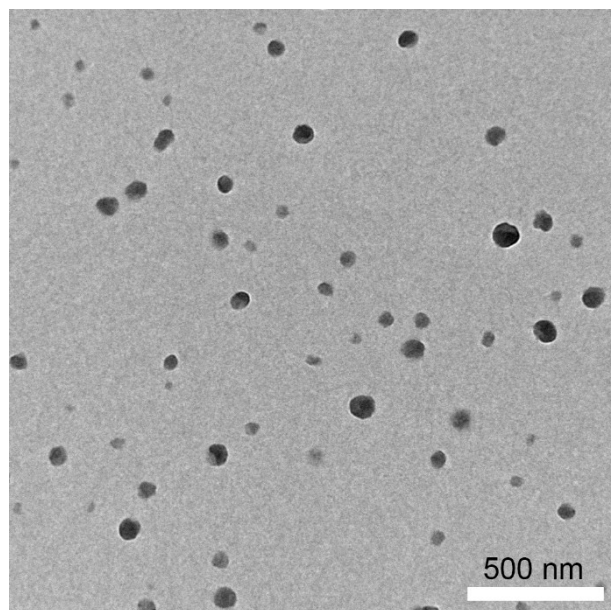

**Fig. S1** The TEM image of PSBTBT NPs.

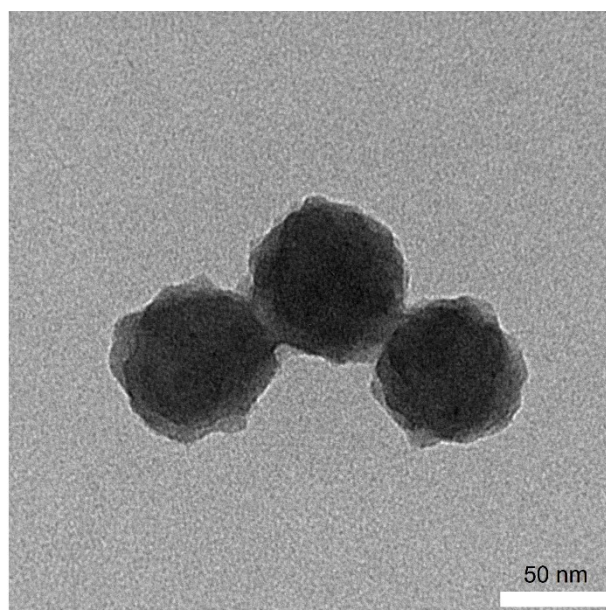

**Fig. S2** The TEM image of PSBTBT@PDA NPs.

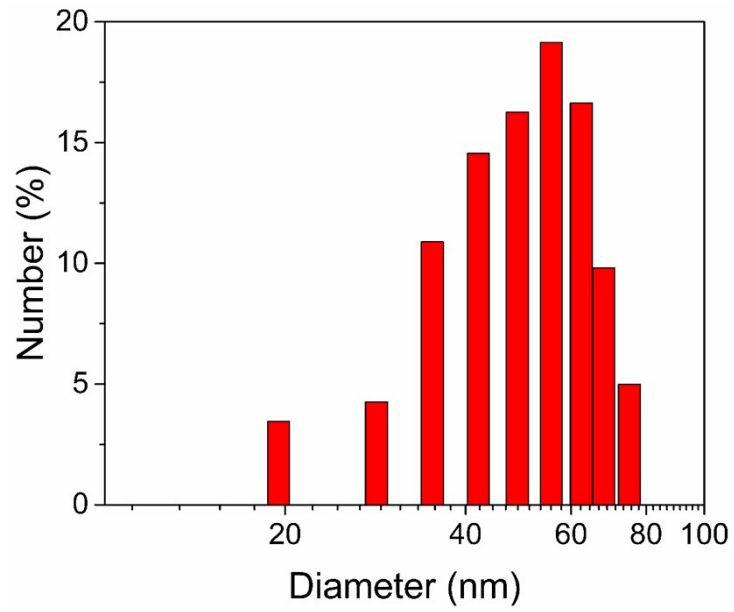

**Fig. S3** The DLS data of PSBTBT NPs.

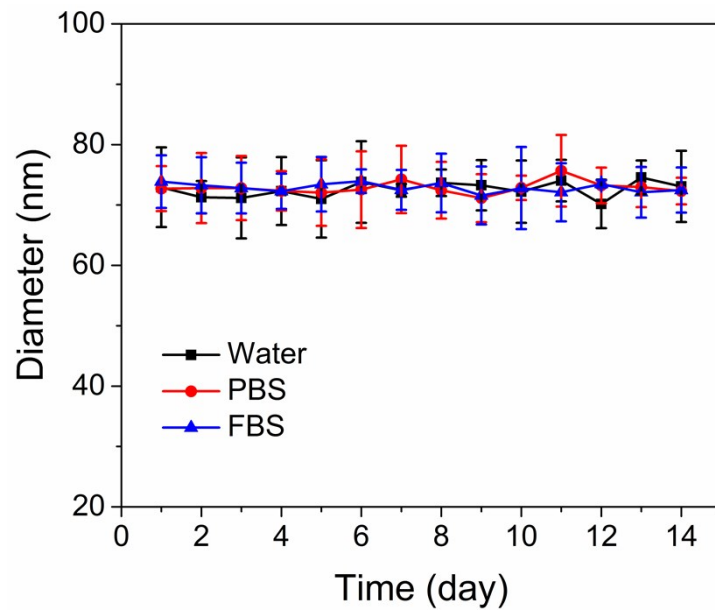

**Fig. S4** The DLS data of PSBTBT@PDA NPs in water, PBS and FBS for 14 days.

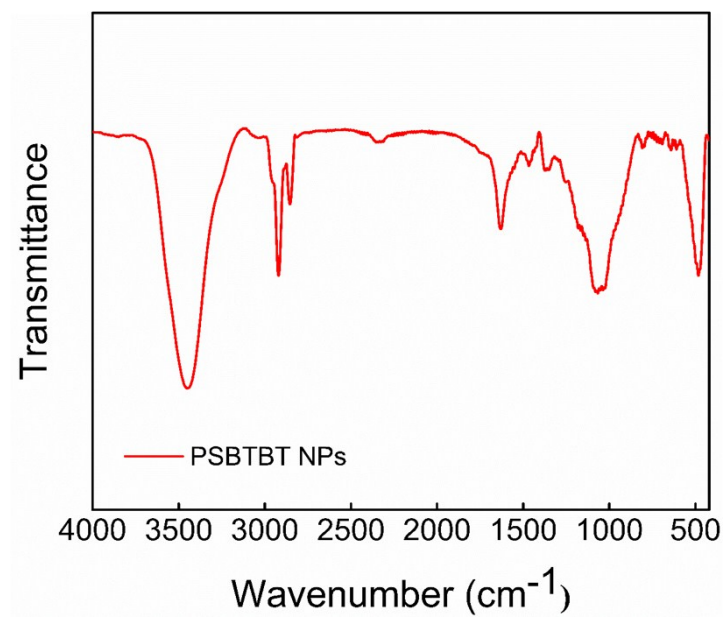

**Fig. S5** The FT-IR spectrum of PSBTBT NPs.
